# Supplementary material
Source: PubMed Central journal article supplement (PMC5398142)
Supplement: Pugh_suppl_1_EPA_procedural_rubric.pdf [file Pugh_suppl_1_EPA_procedural_rubric.pdf]

**Assessment rubric for EPA “Performing a Lumbar Puncture”**

| <b>Essential Skill</b>                                                                                                                                                   | <b>No task execution</b> | <b>Task execution under direct supervision</b> | <b>Task execution with supervision readily available</b> | <b>Unsupervised practice</b> | <b>Supervision may be provided to junior learners</b> |
|--------------------------------------------------------------------------------------------------------------------------------------------------------------------------|--------------------------|------------------------------------------------|----------------------------------------------------------|------------------------------|-------------------------------------------------------|
| <b>Medical Expert</b>                                                                                                                                                    |                          |                                                |                                                          |                              |                                                       |
| Knowing indications/contraindications                                                                                                                                    |                          |                                                |                                                          |                              |                                                       |
| Understanding and gathering equipment<br>Performing the technical aspects<br>Maintaining sterility<br>Demonstrating post-procedure aspects, such as disposing of needles |                          |                                                |                                                          |                              |                                                       |
| Identifying and managing complications                                                                                                                                   |                          |                                                |                                                          |                              |                                                       |
| Knowing what to send CSF for<br>Interpreting the results of the CSF analysis<br>Acting on the results                                                                    |                          |                                                |                                                          |                              |                                                       |
| <b>Communicator</b>                                                                                                                                                      |                          |                                                |                                                          |                              |                                                       |
| Obtaining informed consent                                                                                                                                               |                          |                                                |                                                          |                              |                                                       |
| Documenting the procedure                                                                                                                                                |                          |                                                |                                                          |                              |                                                       |
| Explaining the results to the patient                                                                                                                                    |                          |                                                |                                                          |                              |                                                       |
| <b>Professional</b>                                                                                                                                                      |                          |                                                |                                                          |                              |                                                       |
| Acknowledging personal limits/knowing when someone else should perform the procedure                                                                                     |                          |                                                |                                                          |                              |                                                       |

**Trainee:** \_\_\_\_\_  
**Observer:** \_\_\_\_\_  
**Date:** \_\_\_\_\_

**Comments:**

Pugh D, Cavalcanti RB, Halman S, et al. Using the Entrustable Professional Activities Framework in the Assessment of Procedural Skills. J Grad Med Educ. 2017;9(2):209-214.

**Assessment rubric for EPA “Performing Intubation”**

| <b>Essential Skill</b>                                                                                                                                                                             | <b>No task execution</b> | <b>Task execution under direct supervision</b> | <b>Task execution with supervision readily available</b> | <b>Unsupervised practice</b> | <b>Supervision may be provided to junior learners</b> |
|----------------------------------------------------------------------------------------------------------------------------------------------------------------------------------------------------|--------------------------|------------------------------------------------|----------------------------------------------------------|------------------------------|-------------------------------------------------------|
| <b>Medical Expert</b>                                                                                                                                                                              |                          |                                                |                                                          |                              |                                                       |
| Knowing indications/contraindications                                                                                                                                                              |                          |                                                |                                                          |                              |                                                       |
| Assessing the airway, including predictors of difficult intubation<br>Developing a patient-specific induction plan                                                                                 |                          |                                                |                                                          |                              |                                                       |
| Ensuring equipment availability and proper functioning<br>Ensuring appropriate environment/location for the procedure<br>Developing a patient monitoring plan (e.g., ensure they are on a monitor) |                          |                                                |                                                          |                              |                                                       |
| Performing the technical aspects<br>Confirming placement of ET tube                                                                                                                                |                          |                                                |                                                          |                              |                                                       |
| Anticipating and managing complications                                                                                                                                                            |                          |                                                |                                                          |                              |                                                       |
| Ensuring proper post-intubation care                                                                                                                                                               |                          |                                                |                                                          |                              |                                                       |
| <b>Communicator</b>                                                                                                                                                                                |                          |                                                |                                                          |                              |                                                       |
| Obtaining informed consent (if applicable)                                                                                                                                                         |                          |                                                |                                                          |                              |                                                       |
| Documenting the procedure                                                                                                                                                                          |                          |                                                |                                                          |                              |                                                       |
| <b>Collaborator</b>                                                                                                                                                                                |                          |                                                |                                                          |                              |                                                       |
| Assembling a team and communicating the plan                                                                                                                                                       |                          |                                                |                                                          |                              |                                                       |
| <b>Professional</b>                                                                                                                                                                                |                          |                                                |                                                          |                              |                                                       |
| Acknowledging personal limits/knowing when someone else should perform the procedure                                                                                                               |                          |                                                |                                                          |                              |                                                       |

**Trainee:** \_\_\_\_\_  
**Observer:** \_\_\_\_\_  
**Date:** \_\_\_\_\_

**Comments:**

**Assessment rubric for EPA “Central Venous Catheter Insertion”**

| <b>Essential Skill</b>                                                                                                                                                                                        | <b>No task execution</b> | <b>Task execution under direct supervision</b> | <b>Task execution with supervision readily available</b> | <b>Unsupervised practice</b> | <b>Supervision may be provided to junior learners</b> |
|---------------------------------------------------------------------------------------------------------------------------------------------------------------------------------------------------------------|--------------------------|------------------------------------------------|----------------------------------------------------------|------------------------------|-------------------------------------------------------|
| <b>Medical Expert</b>                                                                                                                                                                                         |                          |                                                |                                                          |                              |                                                       |
| Knowing indications/contraindications<br>Considering other options (i.e., when to use an alternative to central line)                                                                                         |                          |                                                |                                                          |                              |                                                       |
| Understanding and gathering equipment<br>Positioning patient appropriately<br>Using appropriate analgesia and/or sedation<br>Identifying relevant landmarks and understanding suitable anatomy                |                          |                                                |                                                          |                              |                                                       |
| Performing the technical aspects (for any site)<br>Maintaining sterility<br>Using monitoring during procedure (i.e. for IJ, subclavian)<br>Demonstrating post-procedure aspects, such as disposing of needles |                          |                                                |                                                          |                              |                                                       |
| Using ultrasound appropriately                                                                                                                                                                                |                          |                                                |                                                          |                              |                                                       |
| Troubleshooting difficult lines<br>Identifying and managing complications                                                                                                                                     |                          |                                                |                                                          |                              |                                                       |
| Understanding line maintenance (e.g., dressings and flushing post-insertion)<br>Ordering and interpreting imaging post-insertion<br>Knowing when and how to remove a line                                     |                          |                                                |                                                          |                              |                                                       |
| <b>Communicator</b>                                                                                                                                                                                           |                          |                                                |                                                          |                              |                                                       |
| Obtaining informed consent                                                                                                                                                                                    |                          |                                                |                                                          |                              |                                                       |
| Documenting the procedure                                                                                                                                                                                     |                          |                                                |                                                          |                              |                                                       |
| Communicating with other care providers (e.g, nurse)                                                                                                                                                          |                          |                                                |                                                          |                              |                                                       |
| <b>Professional</b>                                                                                                                                                                                           |                          |                                                |                                                          |                              |                                                       |
| Acknowledging personal limits/knowning when someone else should perform the procedure                                                                                                                         |                          |                                                |                                                          |                              |                                                       |

**Trainee:** \_\_\_\_\_  
**Observer:** \_\_\_\_\_  
**Date:** \_\_\_\_\_

**Comments:**

**Assessment rubric for EPA “Arterial Line Insertion”**

| <b>Essential Skill</b>                                                                                                                                                                    | <b>No task execution</b> | <b>Task execution under direct supervision</b> | <b>Task execution with supervision readily available</b> | <b>Unsupervised practice</b> | <b>Supervision may be provided to junior learners</b> |
|-------------------------------------------------------------------------------------------------------------------------------------------------------------------------------------------|--------------------------|------------------------------------------------|----------------------------------------------------------|------------------------------|-------------------------------------------------------|
| <b>Medical Expert</b>                                                                                                                                                                     |                          |                                                |                                                          |                              |                                                       |
| Knowing indications/contraindications                                                                                                                                                     |                          |                                                |                                                          |                              |                                                       |
| Understanding and gathering equipment<br>Selecting appropriate site<br>Understanding of relevant landmarks and anatomy<br>Ensuring the availability of an assistant (if required)         |                          |                                                |                                                          |                              |                                                       |
| Preparing site<br>Positioning patient and self appropriately<br>Using appropriate analgesia                                                                                               |                          |                                                |                                                          |                              |                                                       |
| Performing the technical aspects<br>Maintaining sterility<br>Confirming placement (e.g., waveform)<br>Securing line<br>Demonstrating post-procedure aspects, such as disposing of needles |                          |                                                |                                                          |                              |                                                       |
| Troubleshooting during insertion<br>Troubleshooting after insertion<br>Identifying and managing complications                                                                             |                          |                                                |                                                          |                              |                                                       |
| Knowing when and how to remove a line                                                                                                                                                     |                          |                                                |                                                          |                              |                                                       |
| <b>Communicator</b>                                                                                                                                                                       |                          |                                                |                                                          |                              |                                                       |
| Obtaining informed consent, when appropriate                                                                                                                                              |                          |                                                |                                                          |                              |                                                       |
| Documenting the procedure                                                                                                                                                                 |                          |                                                |                                                          |                              |                                                       |
| Explaining the procedure to the awake patient (i.e. talking them through it)                                                                                                              |                          |                                                |                                                          |                              |                                                       |
| <b>Professional</b>                                                                                                                                                                       |                          |                                                |                                                          |                              |                                                       |
| Acknowledging personal limits/knowing when someone else should perform the procedure                                                                                                      |                          |                                                |                                                          |                              |                                                       |

**Trainee:** \_\_\_\_\_  
**Observer:** \_\_\_\_\_  
**Date:** \_\_\_\_\_

**Comments:**

**Assessment rubric for EPA “Knee arthrocentesis”**

| <b>Essential Skill</b>                                                                                                                                                   | <b>No task execution</b> | <b>Task execution under direct supervision</b> | <b>Task execution with supervision readily available</b> | <b>Unsupervised practice</b> | <b>Supervision may be provided to junior learners</b> |
|--------------------------------------------------------------------------------------------------------------------------------------------------------------------------|--------------------------|------------------------------------------------|----------------------------------------------------------|------------------------------|-------------------------------------------------------|
| <b>Medical Expert</b>                                                                                                                                                    |                          |                                                |                                                          |                              |                                                       |
| Knowing indications/contraindications                                                                                                                                    |                          |                                                |                                                          |                              |                                                       |
| Understanding and gathering equipment<br>Performing the technical aspects<br>Maintaining sterility<br>Demonstrating post-procedure aspects, such as disposing of needles |                          |                                                |                                                          |                              |                                                       |
| Interpreting the results of the synovial fluid analysis                                                                                                                  |                          |                                                |                                                          |                              |                                                       |
| <b>Communicator</b>                                                                                                                                                      |                          |                                                |                                                          |                              |                                                       |
| Obtaining informed consent                                                                                                                                               |                          |                                                |                                                          |                              |                                                       |
| Documenting the procedure                                                                                                                                                |                          |                                                |                                                          |                              |                                                       |
| <b>Professional</b>                                                                                                                                                      |                          |                                                |                                                          |                              |                                                       |
| Acknowledging personal limits/knowing when someone else should perform the procedure                                                                                     |                          |                                                |                                                          |                              |                                                       |

**Trainee:** \_\_\_\_\_  
**Observer:** \_\_\_\_\_  
**Date:** \_\_\_\_\_

**Comments:**

Pugh D, Cavalcanti RB, Halman S, et al. Using the Entrustable Professional Activities Framework in the Assessment of Procedural Skills. J Grad Med Educ. 2017;9(2):209-214.

**Assessment rubric for EPA “Performing a Thoracentesis”**

| <b>Essential Skill</b>                                                                                                                                                   | <b>No task execution</b> | <b>Task execution under direct supervision</b> | <b>Task execution with supervision readily available</b> | <b>Unsupervised practice</b> | <b>Supervision may be provided to junior learners</b> |
|--------------------------------------------------------------------------------------------------------------------------------------------------------------------------|--------------------------|------------------------------------------------|----------------------------------------------------------|------------------------------|-------------------------------------------------------|
| <b>Medical Expert</b>                                                                                                                                                    |                          |                                                |                                                          |                              |                                                       |
| Knowing indications/contraindications<br>Reviewing imaging and tests required to perform the procedure                                                                   |                          |                                                |                                                          |                              |                                                       |
| Understanding and gathering equipment<br>Performing the technical aspects<br>Maintaining sterility<br>Demonstrating post-procedure aspects, such as disposing of needles |                          |                                                |                                                          |                              |                                                       |
| Identifying and managing complications                                                                                                                                   |                          |                                                |                                                          |                              |                                                       |
| Knowing what to send the pleural fluid for<br>Interpreting the results of the pleural fluid analysis                                                                     |                          |                                                |                                                          |                              |                                                       |
| Using ultrasound appropriately                                                                                                                                           |                          |                                                |                                                          |                              |                                                       |
| <b>Communicator</b>                                                                                                                                                      |                          |                                                |                                                          |                              |                                                       |
| Obtaining informed consent                                                                                                                                               |                          |                                                |                                                          |                              |                                                       |
| Documenting the procedure                                                                                                                                                |                          |                                                |                                                          |                              |                                                       |
| <b>Professional</b>                                                                                                                                                      |                          |                                                |                                                          |                              |                                                       |
| Acknowledging personal limits/knowing when someone else should perform the procedure                                                                                     |                          |                                                |                                                          |                              |                                                       |

**Trainee:** \_\_\_\_\_  
**Observer:** \_\_\_\_\_  
**Date:** \_\_\_\_\_

**Comments:**

**Assessment rubric for EPA “Performing a Paracentesis”**

| <b>Essential Skill</b>                                                                                                                                                   | <b>No task execution</b> | <b>Task execution under direct supervision</b> | <b>Task execution with supervision readily available</b> | <b>Unsupervised practice</b> | <b>Supervision may be provided to junior learners</b> |
|--------------------------------------------------------------------------------------------------------------------------------------------------------------------------|--------------------------|------------------------------------------------|----------------------------------------------------------|------------------------------|-------------------------------------------------------|
| <b>Medical Expert</b>                                                                                                                                                    |                          |                                                |                                                          |                              |                                                       |
| Knowing indications/contraindications                                                                                                                                    |                          |                                                |                                                          |                              |                                                       |
| Understanding and gathering equipment<br>Performing the technical aspects<br>Maintaining sterility<br>Demonstrating post-procedure aspects, such as disposing of needles |                          |                                                |                                                          |                              |                                                       |
| Identifying and managing complications                                                                                                                                   |                          |                                                |                                                          |                              |                                                       |
| Knowing what to send the peritoneal fluid for<br>Interpreting the results of the peritoneal fluid analysis                                                               |                          |                                                |                                                          |                              |                                                       |
| Monitoring and care of patient post-procedure                                                                                                                            |                          |                                                |                                                          |                              |                                                       |
| Using ultrasound appropriately                                                                                                                                           |                          |                                                |                                                          |                              |                                                       |
| <b>Communicator</b>                                                                                                                                                      |                          |                                                |                                                          |                              |                                                       |
| Obtaining informed consent                                                                                                                                               |                          |                                                |                                                          |                              |                                                       |
| Documenting the procedure                                                                                                                                                |                          |                                                |                                                          |                              |                                                       |
| <b>Professional</b>                                                                                                                                                      |                          |                                                |                                                          |                              |                                                       |
| Acknowledging personal limits/knowing when someone else should perform the procedure                                                                                     |                          |                                                |                                                          |                              |                                                       |

**Trainee:** \_\_\_\_\_  
**Observer:** \_\_\_\_\_  
**Date:** \_\_\_\_\_

**Comments:**

Pugh D, Cavalcanti RB, Halman S, et al. Using the Entrustable Professional Activities Framework in the Assessment of Procedural Skills. J Grad Med Educ. 2017;9(2):209-214.
