# Supplementary material
Source: PubMed Central journal article supplement (PMC5398142)
Supplement: Pugh_suppl_2_EPA_survey.pdf [file Pugh_suppl_2_EPA_survey.pdf]

# EPA Survey

## Page 1

---

### Introduction

Thank you for taking the time to respond to this survey. We expect that this activity should take no more than 15 minutes. If you wish to be entered into a draw to win one of two iPad minis, you will be asked to provide your name and contact information after completing the survey. Your personal information will be unlinked from the survey for the purposes of data analysis.

This survey will begin by gathering a small amount of demographic data about your University affiliation and hospital position. Then the survey will elicit your opinion regarding Entrustable Professional Activities (EPAs) as they relate to a number of procedures performed by Internal Medicine residents. Through this iterative process, we hope to achieve consensus from a national group of stakeholders on what components are important to include in procedure-related EPAs.

By clicking 'Yes', your consent to use this information is implied. By clicking 'No', you will proceed to the end of this survey.

Yes     No

Pugh D, Cavalcanti RB, Halman S, et al. Using the Entrustable Professional Activities Framework in the Assessment of Procedural Skills. *J Grad Med Educ.* 2017;9(2):209-214.

Did you participate in one of the EPA focus groups that helped to define components for procedural skills (Spring 2015)?

Yes  No

Pugh D, Cavalcanti RB, Halman S, et al. Using the Entrustable Professional Activities Framework in the Assessment of Procedural Skills. *J Grad Med Educ.* 2017;9(2):209-214.

Which of the following best applies to you?

Staff physician (General Internal Medicine)

Resident physician (PGY-3 to PGY-5)

Other (please specify)

Type here

Pugh D, Cavalcanti RB, Halman S, et al. Using the Entrustable Professional Activities Framework in the Assessment of Procedural Skills. J Grad Med Educ. 2017;9(2):209-214.

With which University are you affiliated?

- Dalhousie University
- McGill University
- McMaster University
- Memorial University
- Northern Ontario School of Medicine
- Queen's University
- Université de Montréal
- Université de Sherbrooke
- Université Laval
- University of Alberta
- University of British Columbia
- University of Calgary
- University of Manitoba
- University of Ottawa
- University of Saskatchewan
- University of Toronto
- Western University

Pugh D, Cavalcanti RB, Halman S, et al. Using the Entrustable Professional Activities Framework in the Assessment of Procedural Skills. *J Grad Med Educ.* 2017;9(2):209-214.

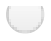

Other (please specify the city in which you work, primarily)

Pugh D, Cavalcanti RB, Halman S, et al. Using the Entrustable Professional Activities Framework in the Assessment of Procedural Skills. *J Grad Med Educ.* 2017;9(2):209-214.

### What are Entrustable Professional Activities (EPAs)?

EPAs describe what we do as a profession.

EPAs are:

- activities you can entrust a trainee to do on your behalf
- focused on holistic performance of an actual physician task

Examples of EPAs:

- obtaining advanced directives/goals of care
- writing admission orders
- performing a lumbar puncture
- performing a thoracentesis

### Components of Entrustable Professional Activities (EPAs)

Although EPAs are quite broad, they can be broken down into a number of components. These are the knowledge, skills and attitudes that are necessary in a trainee in order for a physician to entrust them to perform the EPA on their behalf.

Examples of EPA components that could be related to performing procedures:

Obtaining informed consent

Performing the technical aspects of the procedure

The components are items that can be assessed along a continuum (i.e., things that can be done more or less well). They are NOT a checklist of items related to performing a procedure:

For example, **NOT:**

- Cleaned the area with chlorhexidine

Pugh D, Cavalcanti RB, Halman S, et al. Using the Entrustable Professional Activities Framework in the Assessment of Procedural Skills. *J Grad Med Educ.* 2017;9(2):209-214.

## EPA: Lumbar Puncture

For the EPA "Lumbar Puncture" the following components were developed by a focus group comprised of 7-10 physicians who routinely perform this procedure (General Internists or other Specialists) and/or supervise trainees who perform this procedure.

For each item, please indicate whether or not you believe it should be included as a component for the EPA "Lumbar Puncture". If you do **NOT** think it should be included, please indicate why in the space provided below this list.

|                                                                                       | Should be included    | Should not be included |
|---------------------------------------------------------------------------------------|-----------------------|------------------------|
| 1. Knowing indications/contraindications                                              | <input type="radio"/> | <input type="radio"/>  |
| 2. Obtaining informed consent                                                         | <input type="radio"/> | <input type="radio"/>  |
| 3. Understanding and gathering the equipment                                          | <input type="radio"/> | <input type="radio"/>  |
| 4. Acknowledging personal limits/known when someone else should perform the procedure | <input type="radio"/> | <input type="radio"/>  |
| 5. Performing the technical aspects                                                   | <input type="radio"/> | <input type="radio"/>  |
| 6. Maintaining sterility                                                              | <input type="radio"/> | <input type="radio"/>  |
| 7. Knowing what to send the cerebrospinal fluid for                                   | <input type="radio"/> | <input type="radio"/>  |
| 8. Documenting the procedure                                                          | <input type="radio"/> | <input type="radio"/>  |
| 9. Knowing post-procedure aspects such as disposing of needles (cleaning up)          | <input type="radio"/> | <input type="radio"/>  |

Should be included

Should not be included

10. Identifying and managing complications

11. Interpreting the results of the cerebrospinal fluid analysis

12. Acting on the results

13. Explaining the results to the patients

Justification if you think a component from the above should NOT be included

If applicable, please specify which component you are referring to before justifying why it should not be included. Please include the item number to clarify which component you are referring to.

Type here

Comments or suggestions for additional components

If there are additional components you feel should be included, please add them in the space provided below.

Type here

Pugh D, Cavalcanti RB, Halman S, et al. Using the Entrustable Professional Activities Framework in the Assessment of Procedural Skills. J Grad Med Educ. 2017;9(2):209-214.



## EPA: Intubation

For the EPA "Intubation" the following components were developed by a focus group comprised of 7-10 physicians who routinely perform this procedure (General Internists or other Specialists) and/or supervise trainees who perform this procedure.

For each item, please indicate whether or not you believe it should be included as a component for the EPA "Intubation". If you do **NOT** think it should be included, please indicate why in the space provided below this list.

|                                                                              | Should be included    | Should not be included |
|------------------------------------------------------------------------------|-----------------------|------------------------|
| 1. Knowing indications/contraindications to intubation                       | <input type="radio"/> | <input type="radio"/>  |
| 2. Getting informed consent, if appropriate                                  | <input type="radio"/> | <input type="radio"/>  |
| 3. Assessing the airway, including predictors of difficult intubation        | <input type="radio"/> | <input type="radio"/>  |
| 4. Assembling a team and communicating the plan                              | <input type="radio"/> | <input type="radio"/>  |
| 5. Ensuring equipment availability and proper functioning                    | <input type="radio"/> | <input type="radio"/>  |
| 6. Ensuring appropriate environment/location for the procedure               | <input type="radio"/> | <input type="radio"/>  |
| 7. Developing a patient-specific induction plan                              | <input type="radio"/> | <input type="radio"/>  |
| 8. Developing a patient monitoring plan (e.g., ensure they are on a monitor) | <input type="radio"/> | <input type="radio"/>  |

Should be included

Should not be included

9. Performing the technical aspects

10. Confirming placement of ET tube

11. Anticipating and managing complications

12. Ensuring proper post-intubation care

13. Documenting the procedure

Justification if you think a component from the above should NOT be included

If applicable, please specify which component you are referring to before justifying why it should not be included. Please include the item number to clarify which component you are referring to.

Type here

Comments or suggestions for additional components

If there are additional components you feel should be included, please add them in the space provided below.

Type here

Pugh D, Cavalcanti RB, Halman S, et al. Using the Entrustable Professional Activities Framework in the Assessment of Procedural Skills. J Grad Med Educ. 2017;9(2):209-214.

EPA: Central Line

For the EPA "Central Line" the following components were developed by a focus group comprised of 7-10 physicians who routinely perform this procedure (General Internists or other Specialists) and/or supervise trainees who perform this procedure.

For each item, please indicate whether or not you believe it should be included as a component for the EPA "Central Line". If you do **NOT** think it should be included, please indicate why in the space provided below this list.

|                                                                                 | Should be included    | Should not be included |
|---------------------------------------------------------------------------------|-----------------------|------------------------|
| 1. Knowing indications/contraindications                                        | <input type="radio"/> | <input type="radio"/>  |
| 2. Considering other options (i.e., when to use an alternative to central line) | <input type="radio"/> | <input type="radio"/>  |
| 3. Acknowledging personal limits/when to ask for help                           | <input type="radio"/> | <input type="radio"/>  |
| 4. Getting informed consent                                                     | <input type="radio"/> | <input type="radio"/>  |
| 5. Understanding and gathering equipment                                        | <input type="radio"/> | <input type="radio"/>  |
| 6. Using appropriate analgesia and/or sedation                                  | <input type="radio"/> | <input type="radio"/>  |
| 7. Positioning patient appropriately                                            | <input type="radio"/> | <input type="radio"/>  |
| 8. Identifying relevant landmarks and understanding suitable anatomy            | <input type="radio"/> | <input type="radio"/>  |
| 9. Using ultrasound appropriately                                               | <input type="radio"/> | <input type="radio"/>  |

appropriately

Should be included

Should not be included

10. Using monitoring during procedure (i.e. for IJ, subclavian)

11. Maintaining sterility

12. Performing the technical aspects (for any site)

13. Identifying and managing complications

14. Understanding line maintenance (e.g., dressings and flushing post-insertion)

15. Ordering and interpreting imaging post-insertion

Pugh D, Cavalcanti RB, Halman S, et al. Using the Entrustable Professional Activities Framework in the Assessment of Procedural Skills. J Grad Med Educ. 2017;9(2):209-214.

16. Documenting the procedure

17. Demonstrating post-procedure aspects such as disposing of needles (cleaning up)

18. Communicating with other care providers (e.g., ensuring the patient's nurse is aware that line was inserted)

19. Troubleshooting difficult lines

20. Knowing how to re-wire a line

Should be included

Should not be included

21. Knowing when and how to remove a line

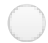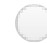

Justification if you think a component from the above should NOT be included

If applicable, please specify which component you are referring to before justifying why it should not be included. Please include the item number to clarify which component you are referring to.

Type here

Comments or suggestions for additional components

If there are additional components you feel should be included, please add them in the space provided below.

Type here

Pugh D, Cavalcanti RB, Halman S, et al. Using the Entrustable Professional Activities Framework in the Assessment of Procedural Skills. J Grad Med Educ. 2017;9(2):209-214.

EPA: Arterial Line

For the EPA "Arterial Line" the following components were developed by a focus group comprised of 7-10 physicians who routinely perform this procedure (General Internists or other Specialists) and/or supervise trainees who perform this procedure.

For each item, please indicate whether or not you believe it should be included as a component for the EPA "Arterial Line". If you do **NOT** think it should be included, please indicate why in the space provided below this list.

|                                                                                 | Should be included    | Should not be included |
|---------------------------------------------------------------------------------|-----------------------|------------------------|
| 1. Knowing indications/contraindications                                        | <input type="radio"/> | <input type="radio"/>  |
| 2. Acknowledging personal limits/known when to ask for help                     | <input type="radio"/> | <input type="radio"/>  |
| 3. Getting informed consent when appropriate                                    | <input type="radio"/> | <input type="radio"/>  |
| 4. Understanding and gathering equipment                                        | <input type="radio"/> | <input type="radio"/>  |
| 5. Explaining the procedure to the awake patient (i.e. talking them through it) | <input type="radio"/> | <input type="radio"/>  |
| 6. Selecting appropriate site                                                   | <input type="radio"/> | <input type="radio"/>  |
| 7. Understanding of relevant landmarks and anatomy                              | <input type="radio"/> | <input type="radio"/>  |
| 8. Preparing site                                                               | <input type="radio"/> | <input type="radio"/>  |
| 9. Positioning patient and self appropriately                                   | <input type="radio"/> | <input type="radio"/>  |
| 10. Ensuring the availability of an assistant                                   | <input type="radio"/> | <input type="radio"/>  |

Should be included

Should not be included

- |                                            |                       |                                                                                                                                                                             |                       |
|--------------------------------------------|-----------------------|-----------------------------------------------------------------------------------------------------------------------------------------------------------------------------|-----------------------|
| 11. Using appropriate analgesia            | <input type="radio"/> |                                                                                                                                                                             | <input type="radio"/> |
| 12. Performing the technical aspects       | <input type="radio"/> |                                                                                                                                                                             | <input type="radio"/> |
| 13. Maintaining sterility                  | <input type="radio"/> |                                                                                                                                                                             | <input type="radio"/> |
| 14. Troubleshooting during insertion       | <input type="radio"/> | Pugh D, Cavalcanti RB, Halman S, et al. Using the Entrustable Professional Activities Framework in the Assessment of Procedural Skills. J Grad Med Educ. 2017;9(2):209-214. | <input type="radio"/> |
| 15. Troubleshooting after insertion        | <input type="radio"/> |                                                                                                                                                                             | <input type="radio"/> |
| 16. Identifying and managing complications | <input type="radio"/> |                                                                                                                                                                             | <input type="radio"/> |
| 17. Confirming placement (e.g., waveform)  | <input type="radio"/> |                                                                                                                                                                             | <input type="radio"/> |
| 18. Securing line                          | <input type="radio"/> |                                                                                                                                                                             | <input type="radio"/> |
| 19. Documenting the procedure              | <input type="radio"/> |                                                                                                                                                                             | <input type="radio"/> |
| 20. Knowing when and how to remove a line  | <input type="radio"/> |                                                                                                                                                                             | <input type="radio"/> |

Justification if you think a component from the above should NOT be included

If applicable, please specify which component you are referring to before justifying why it should not be included. Please include the item number to clarify which component you are referring to.

## Comments or suggestions for additional components

If there are additional components you feel should be included, please add them in the space provided below.

Type here

Pugh D, Cavalcanti RB, Halman S, et al. Using the Entrustable Professional Activities Framework in the Assessment of Procedural Skills. *J Grad Med Educ.* 2017;9(2):209-214.



## EPA: Knee Arthrocentesis

For the EPA "Knee Arthrocentesis" the following components were developed by a focus group comprised of 7-10 physicians who routinely perform this procedure (General Internists or other Specialists) and/or supervise trainees who perform this procedure.

For each item, please indicate whether or not you believe it should be included as a component for the EPA "Knee Arthrocentesis". If you do **NOT** think it should be included, please indicate why in the space provided below this list.

|                                                                                     | Should be included    | Should not be included |
|-------------------------------------------------------------------------------------|-----------------------|------------------------|
| 1. Performing an appropriate history on a patient with a knee effusion              | <input type="radio"/> | <input type="radio"/>  |
| 2. Performing an appropriate physical examination on a patient with a knee effusion | <input type="radio"/> | <input type="radio"/>  |
| 3. Obtaining informed consent                                                       | <input type="radio"/> | <input type="radio"/>  |
| 4. Understanding and gathering the equipment                                        | <input type="radio"/> | <input type="radio"/>  |
| 5. Performing the technical aspects                                                 | <input type="radio"/> | <input type="radio"/>  |
| 6. Maintaining sterility                                                            | <input type="radio"/> | <input type="radio"/>  |
| 7. Demonstrating concern for patient comfort and well-being                         | <input type="radio"/> | <input type="radio"/>  |
| 8. Knowing post-procedure aspects such as disposing of needles (cleaning up)        | <input type="radio"/> | <input type="radio"/>  |

Should be included

Should not be included

9. Interpreting and acting on the results of the synovial fluid analysis

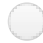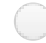

Justification if you think a component from the above should NOT be included

If applicable, please specify which component you are referring to before justifying why it should not be included. Please include the item number to clarify which component you are referring to.

Type here

Comments or suggestions for additional components

If there are additional components you feel should be included, please add them in the space provided below.

Type here

Pugh D, Cavalcanti RB, Halman S, et al. Using the Entrustable Professional Activities Framework in the Assessment of Procedural Skills. J Grad Med Educ. 2017;9(2):209-214.

### EPA: Thoracentesis

For the EPA "Thoracentesis" the following components were developed by a focus group comprised of 7-10 physicians who routinely perform this procedure (General Internists or other Specialists) and/or supervise trainees who perform this procedure.

For each item, please indicate whether or not you believe it should be included as a component for the EPA "Thoracentesis". If you do **NOT** think it should be included, please indicate why in the space provided below this list.

|                                                                  | Should be included    | Should not be included |
|------------------------------------------------------------------|-----------------------|------------------------|
| 1. Knowing indications/contraindications                         | <input type="radio"/> | <input type="radio"/>  |
| 2. Reviewing imaging and tests required to perform the procedure | <input type="radio"/> | <input type="radio"/>  |
| 3. Obtaining informed consent                                    | <input type="radio"/> | <input type="radio"/>  |
| 4. Understanding and gathering the equipment                     | <input type="radio"/> | <input type="radio"/>  |
| 5. Acknowledging personal limits/known when to ask for help      | <input type="radio"/> | <input type="radio"/>  |
| 6. Performing the technical aspects                              | <input type="radio"/> | <input type="radio"/>  |
| 7. Maintaining sterility                                         | <input type="radio"/> | <input type="radio"/>  |
| 8. Knowing what to send the pleural fluid for                    | <input type="radio"/> | <input type="radio"/>  |
| 9. Using ultrasound appropriately                                | <input type="radio"/> | <input type="radio"/>  |

Should be included

Should not be included

10. Documenting the procedure

11. Identifying and managing complications

12. Interpreting the results of the pleural fluid analysis

Justification if you think a component from the above should NOT be included

If applicable, please specify which component you are referring to before justifying why it should not be included. Please include the item number to clarify which component you are referring to.

Type here

Comments or suggestions for additional components

If there are additional components you feel should be included, please add them in the space provided below.

Type here

## EPA: Paracentesis

For the EPA "Paracentesis" the following components were developed by a focus group comprised of 7-10 physicians who routinely perform this procedure (General Internists or other Specialists) and/or supervise trainees who perform this procedure.

For each item, please indicate whether or not you believe it should be included as a component for the EPA "Paracentesis". If you do **NOT** think it should be included, please indicate why in the space provided below this list.

|                                                             | Should be included    | Should not be included |
|-------------------------------------------------------------|-----------------------|------------------------|
| 1. Knowing indications/contraindications                    | <input type="radio"/> | <input type="radio"/>  |
| 2. Obtaining informed consent                               | <input type="radio"/> | <input type="radio"/>  |
| 3. Understanding and gathering the equipment                | <input type="radio"/> | <input type="radio"/>  |
| 4. Acknowledging personal limits/known when to ask for help | <input type="radio"/> | <input type="radio"/>  |
| 5. Performing the technical aspects                         | <input type="radio"/> | <input type="radio"/>  |
| 6. Maintaining sterility                                    | <input type="radio"/> | <input type="radio"/>  |
| 7. Demonstrating concern for patient comfort and well-being | <input type="radio"/> | <input type="radio"/>  |
| 8. Knowing what to send the peritoneal fluid for            | <input type="radio"/> | <input type="radio"/>  |
| 9. Using ultrasound appropriately                           | <input type="radio"/> | <input type="radio"/>  |

Should be included

Should not be included

10. Documenting the procedure

11. Identifying and managing complications

12. Monitoring and care of patient post-procedure

13. Interpreting the results of the peritoneal fluid analysis

14. Demonstrating an ability to communicate and behave professionally

Justification if you think a component from the above should NOT be included

If applicable, please specify which component you are referring to before justifying why it should not be included. Please include the item number to clarify which component you are referring to.

Type here

Comments or suggestions for additional components

If there are additional components you feel should be included, please add them in the space provided below.

Type here

Thank you!

This completes the first iteration of the survey. We may contact you again to complete a shorter survey including only those items for which we did not obtain consensus.

If you wish to be entered into a draw to win one of two iPad minis, please enter your name and email address. Otherwise, please close your browser at this time.

Pugh D, Cavalcanti RB, Halman S, et al. Using the Entrustable Professional Activities Framework in the Assessment of Procedural Skills. *J Grad Med Educ.* 2017;9(2):209-214.

Thank you for your time

You have either declined to participate or have already contributed to our EPA focus groups and thus your data cannot be included in this phase of the study. This concludes the survey.

Pugh D, Cavalcanti RB, Halman S, et al. Using the Entrustable Professional Activities Framework in the Assessment of Procedural Skills. *J Grad Med Educ.* 2017;9(2):209-214.



Online Questionnaire Tools powered by FluidSurveys

 A SurveyMonkey Company.

Pugh D, Cavalcanti RB, Halman S, et al. Using the Entrustable Professional Activities Framework in the Assessment of Procedural Skills. *J Grad Med Educ.* 2017;9(2):209-214.
